# Supplementary material for: Lmx1a is a master regulator of the cortical hem
Source: eLife. 2023 Sep 19;12:e84095. doi: 10.7554/eLife.84095 (PMC10508884; doi:10.7554/eLife.84095)
Supplement: Figure 1—figure supplement 1—source data 1. [file elife-84095-fig1-figsupp1-data1.xlsx]

## Sheet: Fig1_Supplement1
	Fig1_Supplement_1E: Prox1+ DG cells
	n=3 embryos		n=3 embryos
	wt 1	470	Lmx1a-/- 1	101
	wt 2	420	Lmx1a-/- 2	146
	wt 3	412	Lmx1a-/- 3	140
