# Supplementary material for: Lmx1a is a master regulator of the cortical hem
Source: eLife. 2023 Sep 19;12:e84095. doi: 10.7554/eLife.84095 (PMC10508884; doi:10.7554/eLife.84095)
Supplement: Figure 1—figure supplement 2—source data 1. [file elife-84095-fig1-figsupp2-data1.xlsx]

## Sheet: _Fig1_Supplement_2
	Fig. 1E: fraction of migrated BrdU+ cells located in each region at e16
	n=3 embryos			n=3 embryos			n=3 embryos			n=3 embryos
	DMS						FDJ
	wt 1	0.57		Lmx1a-/- 1	0.87		wt 1	0.43		Lmx1a-/- 1	0.13
	wt 2	0.63		Lmx1a-/- 2	0.82		wt 2	0.37		Lmx1a-/- 2	0.18
	wt 3	0.62		Lmx1a-/- 3	0.84		wt 3	0.38		Lmx1a-/- 3	0.16
	Fig. 1H: fraction of migrated BrdU+ cells located in each region at e18.5
	n=3 embryos			n=3 embryos			n=3 embryos			n=3 embryos			n=3 embryos			n=3 embryos
	DMS						FDJ						DG
	wt 1	0.4		Lmx1a-/- 1	0.57		wt 1	0.26		Lmx1a-/- 1	0.21		wt 1	0.34		Lmx1a-/- 1	0.22
	wt 2	0.37		Lmx1a-/- 2	0.59		wt 2	0.28		Lmx1a-/- 2	0.2		wt 2	0.36		Lmx1a-/- 2	0.21
	wt 3	0.41		Lmx1a-/- 3	0.61		wt 3	0.25		Lmx1a-/- 3	0.19		wt 3	0.34		Lmx1a-/- 3	0.2
	Fig. 1I: total number of BrdU+ cells located in the DMS+FDJ+DG regions
	n=3 embryos			n=3 embryos
	wt 1	190		Lmx1a-/- 1	94
	wt 2	174		Lmx1a-/- 2	81
	wt 3	201		Lmx1a-/- 3	79
