# Supplementary material for: Lmx1a is a master regulator of the cortical hem
Source: eLife. 2023 Sep 19;12:e84095. doi: 10.7554/eLife.84095 (PMC10508884; doi:10.7554/eLife.84095)
Supplement: Figure 1—figure supplement 3—source data 1. [file elife-84095-fig1-figsupp3-data1.xlsx]

## Sheet: Fig1_Supplement3
	Fig1_Supplement_3C: apopt cells per mm2 of hipp primordium at e16								Fig1_Supplement_3F: apopt cells per mm2 of hipp primordium at e18.5
	n=3 embryos		n=3 embryos						n=3 embryos		n=3 embryos
	wt 1	0.31	Lmx1a-/- 1	0.37					wt 1	0.48	Lmx1a-/- 1	0
	wt 2	0.49	Lmx1a-/- 2	0.5					wt 2	0.32	Lmx1a-/- 2	0.46
	wt 3	0.5	Lmx1a-/- 3	0.21					wt 3	0.07	Lmx1a-/- 3	0.17
	Fig1_Supplement_3G: % of Casp+ cells among Prox1+ cells in DG at e18.5
	n=3 embryos		n=3 embryos
	wt 1	0	Lmx1a-/- 1	0
	wt 2	0	Lmx1a-/- 2	0
	wt 3	0	Lmx1a-/- 3	0
	Fig1_Supplement_3J: % of Casp+ cells among Prox1+ cells in DG at P3								Fig1_Supplement_3M: % of Casp+ cells among Prox1+ cells in DG at P21
	n=3 embryos		n=3 embryos						n=3 embryos		n=3 embryos
	wt 1	0.7	Lmx1a-/- 1	0.63					wt 1	0.26	Lmx1a-/- 1	0.3
	wt 2	0.41	Lmx1a-/- 2	0.73					wt 2	0.21	Lmx1a-/- 2	0
	wt 3	0.72	Lmx1a-/- 3	0.28					wt 3	0.16	Lmx1a-/- 3	0.23
