# Supplementary material for: Lmx1a is a master regulator of the cortical hem
Source: eLife. 2023 Sep 19;12:e84095. doi: 10.7554/eLife.84095 (PMC10508884; doi:10.7554/eLife.84095)
Supplement: Figure 1—source data 1. [file elife-84095-fig1-data1.xlsx]

## Sheet: Fig_1
	Fig. 1C: CA1-3 length. mm					Fig. 1D: HF length, mm						Fig. 1G: Prox1+ DG cells
	n=3 embryos		n=4 embryos			n=3 embryos		n=3 embryos				n=3 embryos		n=3 embryos
	wt 1	7.98	Lmx1a-/- 1	5.97		wt 1	1.77	Lmx1a-/- 1	0.72			wt 1	779	Lmx1a-/- 1	218
	wt 2	8.26	Lmx1a-/- 2	6.19		wt 2	1.98	Lmx1a-/- 2	0.88			wt 2	719	Lmx1a-/- 2	140
	wt 3	7.31	Lmx1a-/- 3	7.61		wt 3	1.82	Lmx1a-/- 3	0.93			wt 3	694	Lmx1a-/- 3	127
			Lmx1a-/- 4	6.18
	Fig. 1J: DG input resistance						Fig. 1M: e14.5 Prox1+ DNe cells per hemisection
							n=4 embryos			n=4 embryos
	cell number	Wt	Dr				wt 1	200		Lmx1a-/- 1	117
	1	283.129	245.401				wt 2	215		Lmx1a-/- 2	145
	2	320.021	295.103				wt 3	186		Lmx1a-/- 3	139
	3	578.411	298.391				wt 4	221		Lmx1a-/- 4	130
	4	724.006	465.887
	5	524.22	248.857
	6	360.443	168.515
	7	547.349	452.89
	8	309.194	369.096
	9	440.167	352.55
	10	540.463	196.916
	11	523.448	240.673
	12	591.156	298.086
	Fig. 1P: e14.5 BrdU/DAPI in DNe (%)						Fig. 1Q: e14.5 BrdU+ cells in DNe per 100 um of DNe ventricular surface
	n=4 embryos			n=4 embryos			n=4 embryos			n=4 embryos
	wt 1	50.2		Lmx1a-/- 1	34.5		wt 1	28		Lmx1a-/- 1	15
	wt 2	50.6		Lmx1a-/- 2	40.4		wt 2	27		Lmx1a-/- 2	15
	wt 3	52.9		Lmx1a-/- 3	30.8		wt 3	22		Lmx1a-/- 3	19
	wt 4	46.3		Lmx1a-/- 4	33.2		wt 4	26		Lmx1a-/- 4	17
	Fig. 1T: % of apoptotic cells in DNe at e14.5
	n=4 embryos			n=4 embryos
	wt 1	0.5		Lmx1a-/- 1	0
	wt 2	0		Lmx1a-/- 2	0.69
	wt 3	0.54		Lmx1a-/- 3	0.72
	wt 4	0.45		Lmx1a-/- 4	0
