# Supplementary material for: Lmx1a is a master regulator of the cortical hem
Source: eLife. 2023 Sep 19;12:e84095. doi: 10.7554/eLife.84095 (PMC10508884; doi:10.7554/eLife.84095)
Supplement: Figure 2—figure supplement 1—source data 1. [file elife-84095-fig2-figsupp1-data1.xlsx]

## Sheet: Fig2_Supplement1
	Fig2_ Supplement_1C: BrdU+ cells among Lmx1a+ CH cells, %								Fig2_ Supplement_1F: apoptotic cells in CH
	n=3 embryos			n=3 embryos					n=3 embryos		n=3 embryos
	wt 1	41.7		Lmx1a-/- 1	45.1				wt 1	0	Lmx1a-/- 1	0
	wt 2	46.2		Lmx1a-/- 2	38.2				wt 2	0.5	Lmx1a-/- 2	0.3
	wt 3	42.6		Lmx1a-/- 3	38.3				wt 3	0	Lmx1a-/- 3	0.3
