# Supplementary material for: Lmx1a is a master regulator of the cortical hem
Source: eLife. 2023 Sep 19;12:e84095. doi: 10.7554/eLife.84095 (PMC10508884; doi:10.7554/eLife.84095)
Supplement: Figure 2—figure supplement 2—source data 1. [file elife-84095-fig2-figsupp2-data1.xlsx]

## Sheet: Fig2_Supplement2
	Fig2_Supplement_2C: HF length (um) at P3
	n=3 embryos		n=3 embryos
	wt 1	710.3	Lmx1a-/- 1	357.1
	wt 2	699.9	Lmx1a-/- 2	405.4
	wt 3	755.1	Lmx1a-/- 3	370.6
