# Supplementary material for: Lmx1a is a master regulator of the cortical hem
Source: eLife. 2023 Sep 19;12:e84095. doi: 10.7554/eLife.84095 (PMC10508884; doi:10.7554/eLife.84095)
Supplement: Figure 2—figure supplement 4—source data 1. [file elife-84095-fig2-figsupp4-data1.xlsx]

## Sheet: Fig2_Supplement4
	Fig2_Supplement_4E: Cux2 expression
	scrambled shRNA		anti-Lmx1a shRNA
	embryo 1	1.08	embryo 1	0.47
	embryo 2	0.92	embryo 2	0.94
	embryo 3	0.84	embryo 3	0.65
	embryo 4	1.1	embryo 4	0.51
	embryo 5	1.06	embryo 5	0.74
	Fig2_Supplement_4F: Slc17a8 expression
	scrambled shRNA		anti-Lmx1a shRNA
	embryo 1	1.09	embryo 1	0.66
	embryo 2	0.94	embryo 2	0.45
	embryo 3	0.92	embryo 3	0.23
	embryo 4	1.19	embryo 4	0.47
	embryo 5	0.86	embryo 5	0.24
	Fig2_Supplement_4G: Ccdc3 expression
	scrambled shRNA		anti-Lmx1a shRNA
	embryo 1	0.77	embryo 1	0.72
	embryo 2	1.17	embryo 2	0.31
	embryo 3	1.07	embryo 3	0.47
	embryo 4	0.95	embryo 4	0.39
	embryo 5	1.04	embryo 5	0.54
	Fig2_Supplement_4H: Adamts expression
	scrambled shRNA		anti-Lmx1a shRNA
	embryo 1	1.09	embryo 1	0.77
	embryo 2	0.9	embryo 2	0.39
	embryo 3	1.11	embryo 3	0.78
	embryo 4	1.02	embryo 4	0.48
	embryo 5	0.88	embryo 5	0.51
	Fig2_Supplement_4I: Wnt3a expression
	scrambled shRNA		anti-Lmx1a shRNA
	embryo 1	0.93	embryo 1	1
	embryo 2	1.09	embryo 2	0.83
	embryo 3	1.01	embryo 3	0.72
	embryo 4	1.1	embryo 4	0.69
	embryo 5	0.87	embryo 5	0.84
	Fig2_Supplement_4J: Tbr2 expression
	scrambled shRNA		anti-Lmx1a shRNA
	embryo 1	0.88	embryo 1	0.83
	embryo 2	0.95	embryo 2	0.7
	embryo 3	0.97	embryo 3	0.85
	embryo 4	1.09	embryo 4	0.92
	embryo 5	1.11	embryo 5	0.91
	Fig2_Supplement_4K: Cdkn1a expression
	scrambled shRNA		anti-Lmx1a shRNA
	embryo 1	0.79	embryo 1	0.58
	embryo 2	0.98	embryo 2	0.69
	embryo 3	0.93	embryo 3	0.49
	embryo 4	1.14	embryo 4	0.6
	embryo 5	1.16	embryo 5	0.55
