# Supplementary material for: Lmx1a is a master regulator of the cortical hem
Source: eLife. 2023 Sep 19;12:e84095. doi: 10.7554/eLife.84095 (PMC10508884; doi:10.7554/eLife.84095)
Supplement: Figure 2—source data 1. [file elife-84095-fig2-data1.xlsx]

## Sheet: Fig_2
	Fig. 2C: cell cycle exit: BrdU+/Ki67- divided by BrdU+ (%)								Fig. 2F: HF length at e15.5, um
	n=4 embryos			n=3 embryos					n=4 embryos			n=4 embryos
	wt 1	54.3		Lmx1a-/- 1	42.6				wt 1	327.9		Lmx1a-/- 1	160.5
	wt 2	59.2		Lmx1a-/- 2	47.7				wt 2	290.5		Lmx1a-/- 2	145.3
	wt 3	62.1		Lmx1a-/- 3	46.2				wt 3	319.2		Lmx1a-/- 3	192.5
	wt 4	61.2							wt 4	259.3		Lmx1a-/- 4	153.8
