# Supplementary material for: Lmx1a is a master regulator of the cortical hem
Source: eLife. 2023 Sep 19;12:e84095. doi: 10.7554/eLife.84095 (PMC10508884; doi:10.7554/eLife.84095)
Supplement: Figure 4—figure supplement 1—source data 1. [file elife-84095-fig4-figsupp1-data1.xlsx]

## Sheet: Fig4_Supplement1
	Fig4_Supplement 1F: HF length (um)
	n=3 embryos			n=3 embryos
	Lmx1a-Cre;Tbr2+/+ 1	700.4		Lmx1a-Cre;Tbr2F/F 1	466.1
	Lmx1a-Cre;Tbr2+/+ 2	755.3		Lmx1a-Cre;Tbr2F/F 2	411.6
	Lmx1a-Cre;Tbr2+/+ 3	680.6		Lmx1a-Cre;Tbr2F/F 3	392.5
