# Supplementary material for: Lmx1a is a master regulator of the cortical hem
Source: eLife. 2023 Sep 19;12:e84095. doi: 10.7554/eLife.84095 (PMC10508884; doi:10.7554/eLife.84095)
Supplement: Figure 4—figure supplement 3—source data 1. [file elife-84095-fig4-figsupp3-data1.xlsx]

## Sheet: Fig4_Supplement3
	Fig4_Supplement_3E: RG fiber per hillus at e18.5
	wt1		48		Lmx1a+/- 1	46		Lmx1a-Cre;Tbr2F/+ 1	52		Lmx1a+/-;Lmx1a-Cre;Tbr2F/+ 1		31
	wt2		53		Lmx1a+/- 2	42		Lmx1a-Cre;Tbr2F/+ 2	46		Lmx1a+/-;Lmx1a-Cre;Tbr2F/+ 2		36
	wt3		52		Lmx1a+/- 3	43		Lmx1a-Cre;Tbr2F/+ 3	43		Lmx1a+/-;Lmx1a-Cre;Tbr2F/+ 3		36
											Lmx1a+/-;Lmx1a-Cre;Tbr2F/+ 4		34
