# Supplementary material for: Lmx1a is a master regulator of the cortical hem
Source: eLife. 2023 Sep 19;12:e84095. doi: 10.7554/eLife.84095 (PMC10508884; doi:10.7554/eLife.84095)
Supplement: Figure 5—figure supplement 1—source data 1. [file elife-84095-fig5-figsupp1-data1.xlsx]

## Sheet: Fig5_Supplement1
	Fig5_Supplement_1D
	fraction of GFP+ cells that are Ki67+
	wt1		0.932		Lmx1a-/- 1	0.969
	wt2		0.97		Lmx1a-/- 2	0.905
	wt3		0.95		Lmx1a-/- 3	1
