# Supplementary material for: Lmx1a is a master regulator of the cortical hem
Source: eLife. 2023 Sep 19;12:e84095. doi: 10.7554/eLife.84095 (PMC10508884; doi:10.7554/eLife.84095)
Supplement: Figure 5—source data 1. [file elife-84095-fig5-data1.xlsx]

## Sheet: Fig_5
	Fig. 5D: Fluorescent intensity of Cdkn1a+ cells in CH (arbitrary units)
	n=3 embryos		n=3 embryos
	wt1	76.4	Lmx1a-/- 1	39.2
	wt2	73.1	Lmx1a-/- 2	40.2
	wt3	80.6	Lmx1a-/- 3	36.1
	Fig. 5H: cell cylce exit of electroporated cells in CH, GFP+/Ki67- divided by GFP+ (%)
	n=3 embryos			n=3 embryos			n=3 embryos
	wt , EP:GFP 1	68.3		Lmx1a-/-, EP: GFP 1	49.3		Lmx1a-/-, EP: GFP+Cdkn1a 1	77.6
	wt , EP:GFP 2	61.4		Lmx1a-/-, EP: GFP 2	50.7		Lmx1a-/-, EP: GFP+Cdkn1a 2	75.1
	wt , EP:GFP 3	70.5		Lmx1a-/-, EP: GFP 3	41.5		Lmx1a-/-, EP: GFP+Cdkn1a 3	65.8
	Fig. 5L: p73+ (CR) cells per hemisection
	n=4 embryos			n=4 embryos			n=3 embryos
	wt, EP:GFP 1	88		Lmx1a-/-, EP: GFP 1	58		Lmx1a-/-, EP: GFP+Cdkn1a 1	93
	wt , EP:GFP 2	80		Lmx1a-/-, EP: GFP 2	48		Lmx1a-/-, EP: GFP+Cdkn1a 2	75
	wt , EP:GFP 3	94		Lmx1a-/-, EP: GFP 3	69		Lmx1a-/-, EP: GFP+Cdkn1a 3	86
	wt, EP:GFP 4	83		Lmx1a-/-, EP: GFP 4	51
